# Supplementary material for: Quantum mechanical, molecular docking, molecular dynamics, ADMET and antiproliferative activity onTrypanosoma cruzi(Y strain) of chalcone (E)-1-(2-hydroxy-3,4,6-trimethoxyphenyl)-3-(3-nitrophenyl)prop-2-en-1-one derived from a natural product
Source: Royal Society of Chemistry journal article supplement (doi:10.1039/d1cp04992e), 2022-01-01
Supplement: d1cp04992e1.pdf [file d1cp04992e1.pdf]

## Supplementary Material

### Quantum mechanical, molecular docking, molecular dynamics, ADMET and antiproliferative activity on *Trypanosoma cruzi* (Y strain) of chalcone (*E*)-1-(2- hydroxy-3,4,6-trimethoxyphenyl)-3-(3-nitrophenyl)prop-2-en-1-one derived from natural product

Maria Geysillene Castro Matos<sup>a</sup>, Leonardo P. da Silva<sup>b</sup>, Francisco Wagner Queiroz Almeida-Neto<sup>b</sup>, Emanuelle Machado Marinho<sup>b</sup>, Ramon Róseo Paula Pessoa Bezerra de Menezes<sup>d</sup>, Tiago Lima Sampaio<sup>d</sup>, Matheus Nunes da Rocha<sup>f</sup>, Lyanna Rodrigues Ribeiro<sup>d</sup>, Emanuel paula magalhaes<sup>d</sup>, Alexandre Magno Rodrigues Teixeira<sup>a,h</sup>, Hércio Silva dos Santos<sup>a,e,h\*</sup>, Emmanuel Silva Marinho<sup>f,h</sup>, Pedro de Lima-Neto<sup>b</sup>, Alice Maria Costa Martins<sup>d</sup>, Norberto K. V. Monteiro<sup>a</sup>, Márcia Machado Marinho<sup>c</sup>

<sup>a</sup> State University of Ceará, Center for Science and Technology, Postgraduate Program in Natural Sciences, Fortaleza, Ceará, Brazil.

<sup>b</sup> Federal University of Ceará, Department of Analytical Chemistry and Physical Chemistry, Campus do Pici, Fortaleza, CE, Brazil.

<sup>c</sup> Faculty of Education, Science and Letters of Iguatu, State University of Ceará, Iguatu, Ceará, Brazil.

<sup>d</sup> Federal University of Ceará, Department of Clinical and Toxicological Analysis, Fortaleza, CE, Brazil.

<sup>e</sup> State University of Vale do Acaraú, Center for Exact Sciences and Technology, Sobral, CE, Brazil.

<sup>f</sup> State University of Ceará, Faculty of Philosophy Dom Aureliano Matos, Limoeiro do Norte, CE, Brazil.

<sup>g</sup> Oswaldo Cruz Foundation, Multiuser Research and Development Laboratory - Antibodies and Nanobodies Platform, Eusébio, CE, Brazil.

<sup>h</sup> Regional University of Cariri, Department of Biological Chemistry, Crato, CE, Brazil.

\*Corresponding author. State University of Vale do Acaraú, Center for Exact Sciences and Technology, Sobral, CE, Brazil. E-mail addresses: [helciodossantos@gmail.com](mailto:helciodossantos@gmail.com)

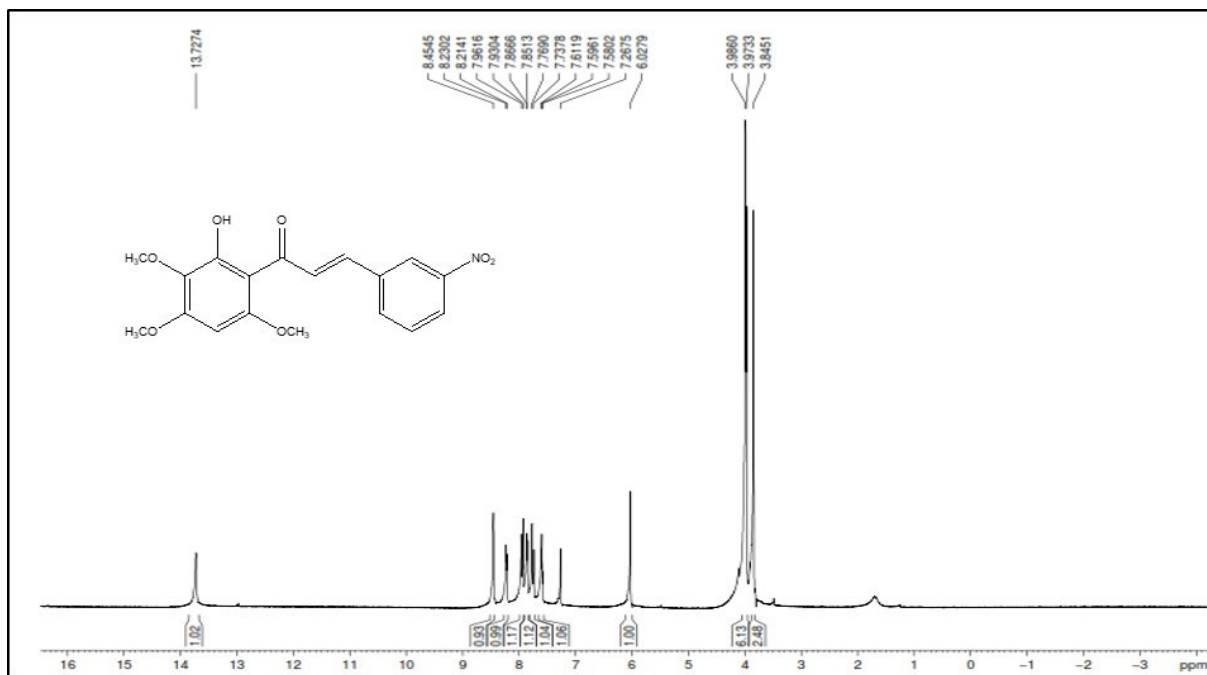

Figure S1. <sup>1</sup>H NMR Spectrum (CDCl<sub>3</sub>, 500 MHz) of chalcone CPN<sub>3</sub>NO<sub>2</sub>.

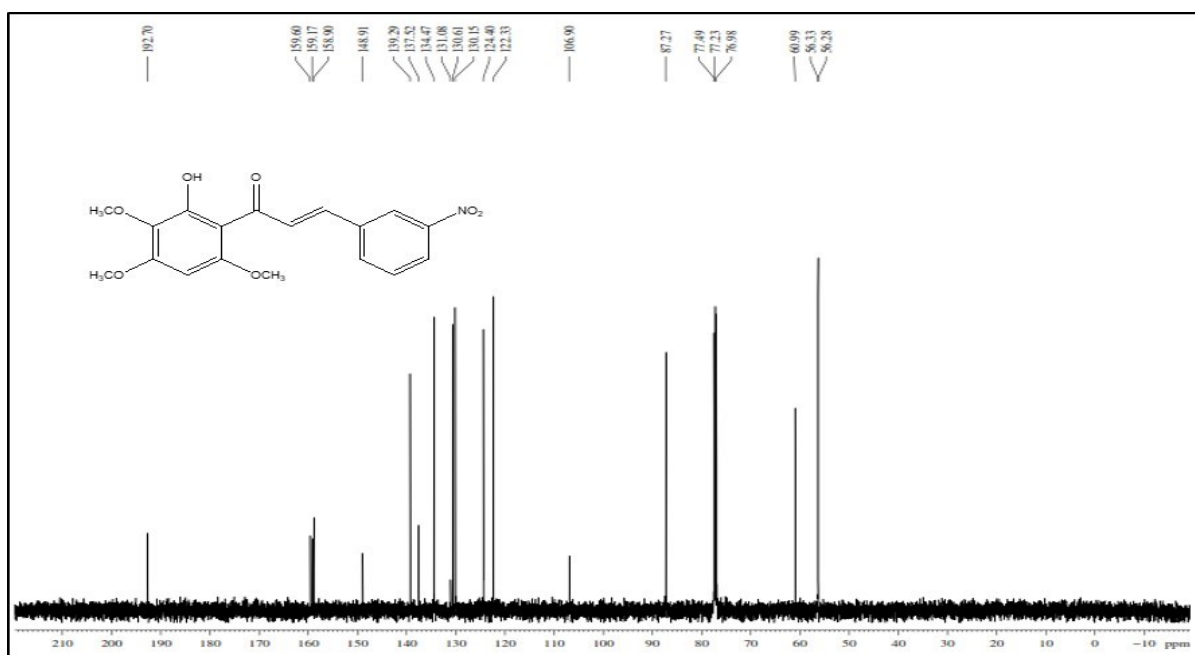

Figure S2. <sup>13</sup>C-NMR Spectrum (CDCl<sub>3</sub>, 125 MHz) of chalcone CPN<sub>3</sub>NO<sub>2</sub>.

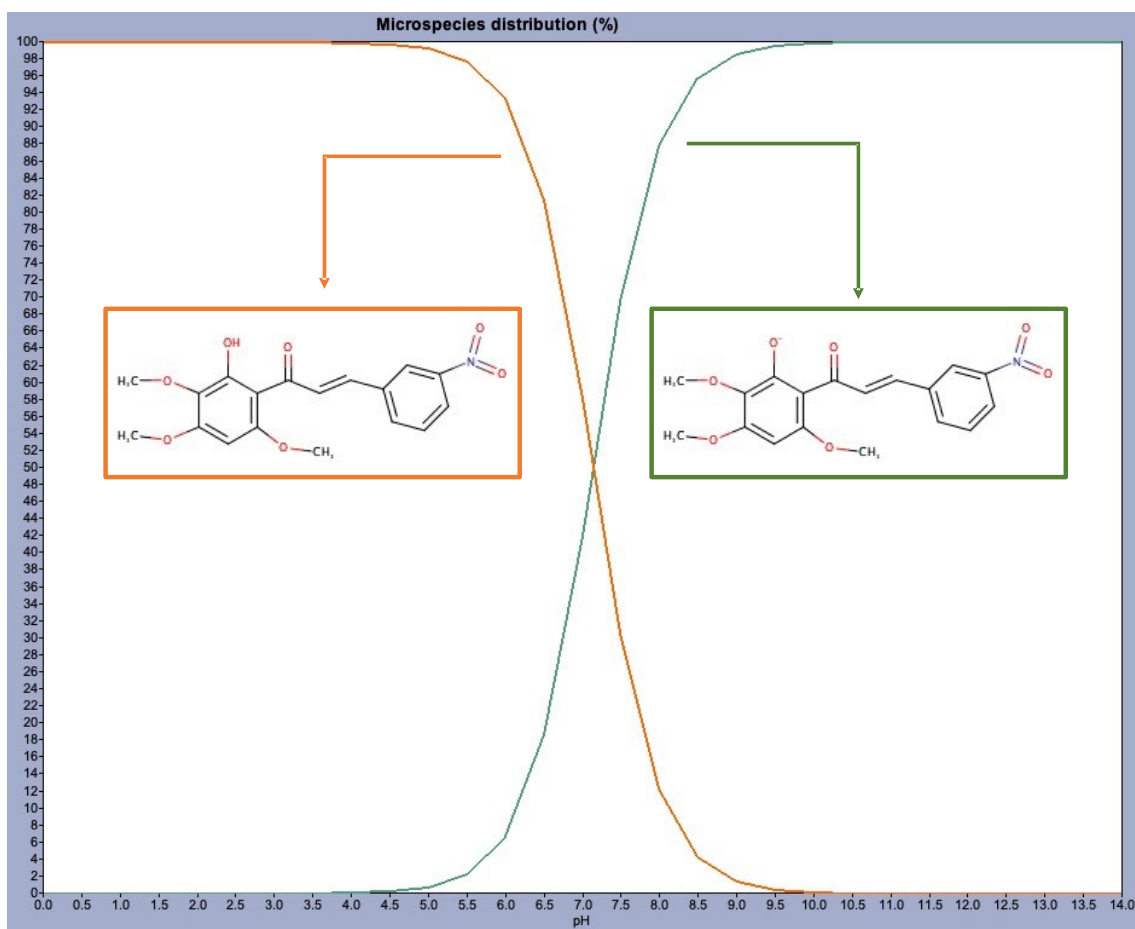

**Figure S3.** Macrospecies distribution (%) as a function of pH for CPN<sub>3</sub>NO<sub>2</sub>.

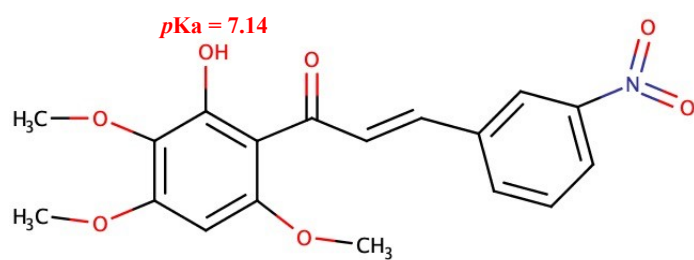

**Figure S4.** pKa value for the hydroxyl group of the CPN<sub>3</sub>NO<sub>2</sub>.

**Tabela S1.** Geometric parameters (bond lengths and bond angles) of the optimized structure of CPN3NO2.

| Bond lengths | Calc. (Å) |
|--------------|-----------|--------------|-----------|--------------|-----------|--------------|-----------|
| R(1-2)       | 1.402     | R(7-13)      | 1.433     | R(15-22)     | 1.094     | R(34-41)     | 1.483     |
| R(1-6)       | 1.397     | R(8-25)      | 0.999     | R(15-23)     | 1.089     | R(36-38)     | 1.39      |
| R(1-7)       | 1.367     | R(10-14)     | 1.424     | R(15-24)     | 1.094     | R(36-39)     | 1.083     |
| R(2-3)       | 1.438     | R(11-26)     | 1.251     | R(27-28)     | 1.344     | R(38-40)     | 1.081     |
| R(2-8)       | 1.334     | R(11-27)     | 1.483     | R(27-29)     | 1.077     | R(41-42)     | 1.224     |
| R(3-4)       | 1.427     | R(12-15)     | 1.425     | R(28-30)     | 1.086     | R(41-43)     | 1.225     |
| R(3-11)      | 1.47      | R(13-16)     | 1.09      | R(28-31)     | 1.464     | R(25-26)     | 1.566     |
| R(4-5)       | 1.388     | R(13-17)     | 1.092     | R(31-32)     | 1.403     |              |           |
| R(4-12)      | 1.363     | R(13-18)     | 1.095     | R(31-33)     | 1.406     |              |           |
| R(5-6)       | 1.405     | R(14-19)     | 1.095     | R(32-34)     | 1.385     |              |           |
| R(5-9)       | 1.077     | R(14-20)     | 1.095     | R(32-35)     | 1.08      |              |           |
| R(6-10)      | 1.351     | R(14-21)     | 1.088     | R(33-36)     | 1.393     |              |           |

| Bond angles | Calc. (°) |
|-------------|-----------|-------------|-----------|-------------|-----------|-------------|-----------|
| A(2-1-6)    | 119.1     | A(4-5-6)    | 120.4     | A(12-15-23) | 105.6     | A(31-32-34) | 119.5     |
| A(2-1-7)    | 120.9     | A(4-5-9)    | 120.1     | A(12-15-24) | 111.1     | A(31-32-35) | 121.7     |
| A(1-2-3)    | 121.9     | A(4-12-15)  | 119.8     | A(16-13-17) | 109.6     | A(31-33-36) | 121.5     |
| A(1-2-8)    | 116.3     | A(6-5-9)    | 119.6     | A(16-13-18) | 109.4     | A(31-33-37) | 118.9     |
| A(6-1-7)    | 119.8     | A(5-6-10)   | 123.4     | A(17-13-18) | 110.1     | A(34-32-35) | 118.8     |
| A(1-6-5)    | 120.6     | A(6-10-14)  | 119.5     | A(19-14-20) | 109.8     | A(32-34-38) | 122.7     |
| A(1-6-10)   | 116       | A(7-13-16)  | 106       | A(19-14-21) | 109.3     | A(32-34-41) | 118.5     |
| A(1-7-13)   | 115.6     | A(7-13-17)  | 111       | A(20-14-21) | 109.3     | A(36-33-37) | 119.6     |
| A(3-2-8)    | 121.7     | A(7-13-18)  | 110.6     | A(22-15-23) | 109.3     | A(33-36-38) | 120.3     |
| A(2-3-4)    | 116.5     | A(8-25-26)  | 149.8     | A(22-15-24) | 109.9     | A(33-36-39) | 120       |
| A(2-3-11)   | 117.5     | A(10-14-19) | 111.5     | A(23-15-24) | 109.4     | A(38-34-41) | 118.8     |
| A(2-8-25)   | 106.2     | A(10-14-20) | 111.4     | A(28-27-29) | 121.9     | A(34-38-36) | 117.9     |
| A(4-3-11)   | 126.1     | A(10-14-21) | 105.5     | A(27-28-30) | 117.4     | A(34-38-40) | 119.9     |
| A(3-4-5)    | 121.5     | A(26-11-27) | 117.7     | A(27-28-31) | 126.6     | A(34-41-42) | 117.6     |
| A(3-4-12)   | 117.5     | A(11-26-25) | 104       | A(30-28-31) | 116.1     | A(34-41-43) | 117.8     |
| A(3-11-26)  | 119.9     | A(11-27-28) | 120.1     | A(28-31-32) | 122.8     | A(38-36-39) | 119.7     |
| A(3-11-27)  | 122.4     | A(11-27-    | 117.9     | A(28-31-    | 119.1     | A(36-38-    | 122.1     |

|           |     |             |       |             |     |             |       |
|-----------|-----|-------------|-------|-------------|-----|-------------|-------|
|           |     | 29)         |       | 33)         |     | 40)         |       |
| A(5-4-12) | 121 | A(12-15-22) | 111.4 | A(32-31-33) | 118 | A(42-41-43) | 124.6 |

**Tabela S2.** The Condensed Fukui functions for the nucleophilic attack ( $f^+$ ), electrophilic attack ( $f^-$ ), radical attack ( $f^\circ$ ), the dual descriptor ( $\Delta f$ ) calculated for the title chalcone at B3LYP/6-311++G(d,p) computational level using the Hirshfeld charge population.

|       | $f^+$    | $f^-$    | $f^\circ$ | $\Delta f$ |
|-------|----------|----------|-----------|------------|
| 1(C)  | 0.013613 | 0.109342 | 0.061478  | -0.09573   |
| 2(C)  | 0.016307 | 0.035639 | 0.025973  | -0.01933   |
| 3(C)  | 0.002137 | 0.030139 | 0.016138  | -0.028     |
| 4(C)  | 0.013089 | 0.054716 | 0.033902  | -0.04163   |
| 5(C)  | 0.014723 | 0.041083 | 0.027903  | -0.02636   |
| 6(C)  | 0.027024 | 0.037254 | 0.032139  | -0.01023   |
| 7(O)  | 0.009408 | 0.064398 | 0.036903  | -0.05499   |
| 8(O)  | 0.024531 | 0.053046 | 0.038789  | -0.02852   |
| 9(H)  | 0.01061  | 0.023207 | 0.016909  | -0.0126    |
| 10(O) | 0.018258 | 0.041442 | 0.02985   | -0.02318   |
| 11(C) | 0.05172  | 0.008857 | 0.030289  | 0.042863   |
| 12(O) | -0.00163 | 0.055501 | 0.026933  | -0.05714   |
| 13(C) | 0.006409 | 0.026191 | 0.0163    | -0.01978   |
| 14(C) | 0.008047 | 0.018094 | 0.01307   | -0.01005   |
| 15(C) | 0.005329 | 0.017546 | 0.011437  | -0.01222   |
| 16(H) | 0.011585 | 0.027579 | 0.019582  | -0.01599   |
| 17(H) | 0.00255  | 0.017473 | 0.010012  | -0.01492   |
| 18(H) | 0.006068 | 0.022765 | 0.014417  | -0.0167    |
| 19(H) | 0.006656 | 0.016983 | 0.01182   | -0.01033   |
| 20(H) | 0.007125 | 0.017216 | 0.01217   | -0.01009   |
| 21(H) | 0.012085 | 0.021708 | 0.016896  | -0.00962   |
| 22(H) | 0.007947 | 0.017713 | 0.01283   | -0.00977   |
| 23(H) | 0.002355 | 0.021176 | 0.011765  | -0.01882   |
| 24(H) | 0.010374 | 0.017688 | 0.014031  | -0.00731   |
| 25(H) | 0.010252 | 0.019245 | 0.014748  | -0.00899   |
| 26(O) | 0.054204 | 0.028533 | 0.041368  | 0.025671   |
| 27(C) | 0.0438   | -0.00904 | 0.017381  | 0.052838   |
| 28(C) | 0.042022 | 0.031891 | 0.036956  | 0.010131   |
| 29(H) | 0.015341 | -7E-05   | 0.007635  | 0.015411   |
| 30(H) | 0.020203 | 0.012666 | 0.016435  | 0.007537   |
| 31(C) | 0.024637 | -0.00055 | 0.012045  | 0.025185   |
| 32(C) | 0.012634 | 0.005022 | 0.008828  | 0.007612   |
| 33(C) | 0.05926  | 0.012957 | 0.036109  | 0.046302   |

|        |          |  |          |  |          |  |          |
|--------|----------|--|----------|--|----------|--|----------|
| 34(C ) | 0.021542 |  | 0.008256 |  | 0.014899 |  | 0.013286 |
| 35(H ) | 0.01131  |  | -0.00188 |  | 0.004716 |  | 0.013187 |
| 36(C ) | 0.034295 |  | 0.014738 |  | 0.024516 |  | 0.019556 |
| 37(H ) | 0.029239 |  | 0.007232 |  | 0.018236 |  | 0.022007 |
| 38(C ) | 0.065385 |  | 0.023799 |  | 0.044592 |  | 0.041586 |
| 39(H ) | 0.026802 |  | 0.011805 |  | 0.019303 |  | 0.014997 |
| 40(H ) | 0.03333  |  | 0.0127   |  | 0.023015 |  | 0.02063  |
| 41(N ) | 0.046424 |  | 0.002672 |  | 0.024548 |  | 0.043752 |
| 42(O ) | 0.082641 |  | 0.021066 |  | 0.051854 |  | 0.061575 |
| 43(O ) | 0.080361 |  | 0.002194 |  | 0.041278 |  | 0.078167 |

**Table S3.** Affinity energy and RMSD values of the complexes formed after docking simulations against the Cruzain enzyme

| Complex      | Parameters           |                        |      |             |
|--------------|----------------------|------------------------|------|-------------|
|              | Energy<br>(kcal/mol) | Ki                     | pKi  | RMSD<br>(Å) |
| CPAB-cruzain | -6.9                 | $8.704 \times 10^{-5}$ | 5.06 | 1.976       |
| BZN-cruzain  | -6.0                 | $3.979 \times 10^{-5}$ | 4.40 | 1.728       |
| KB2-cruzain* | -5.6                 | $7.818 \times 10^{-5}$ | 4.11 | 1.590       |

\*ligand co-crystalized (redocking); BZN: benznidazol; KB2: (3S)-3-(4-((1S)-1,2-dimethyl-1-[(quinolin-6-ylmethyl)amino]propyl)-1H-1,2,3-triazol-1-yl)heptan-2-one.

**Table S4.** Interactions between CPAB, CPAC, BZN and KB2 with cruzin

| Binder  | Receiver  | Interaction     | Distance (Å) |
|---------|-----------|-----------------|--------------|
| CPN3NO2 | Trp 184 A | Hydrofobic      | 3.47         |
|         | Trp 184 A | Hydrofobic      | 3.59         |
|         | Trp 184 A | Hydrofobic      | 3.75         |
|         | Trp 184 A | Hydrofobic      | 3.82         |
|         | Gln 19A   | H-Bond          | 2.98         |
|         | Trp 184 A | H-Bond          | 2.31         |
| BZN     | Trp 184A  | Hydrofobic      | 3.52         |
|         | Trp 184A  | Hydrofobic      | 3.78         |
|         | Trp 184A  | Hydrofobic      | 3.67         |
|         | Trp 188A  | Hydrofobic      | 3.99         |
|         | Gln 21A   | H-Bond          | 3.54         |
|         | Trp 184A  | $\pi$ -stacking | 4.54         |
| KB2*    | Leu 67A   | Hydrofobic      | 3.88         |
|         | Leu 67A   | Hydrofobic      | 3.59         |
|         | Gln 19A   | H-Bond          | 2.28         |
|         | Cys 25A   | H-Bond          | 2.18         |
|         | Gly 66A   | H-Bond          | 1.87         |
|         | Gly 66A   | H-Bond          | 2.27         |

\*ligand co-crystalized (redocking); BZN: Benznidazol; KB2: (3S)-3-(4-((1S)-1,2-dimethyl-1-[(quinolin-6-ylmethyl)amino]propyl)-1H-1,2,3-triazol-1-yl)heptan-2-one.
